# Supplementary material for: Extrusion of apple pomace increases antioxidant activity uponin vitrodigestion
Source: Royal Society of Chemistry journal article supplement (doi:10.1039/c8fo01083h), 2019-01-01
Supplement: c8fo01083h1.pdf [file c8fo01083h1.pdf]

**Supplementary Table 1**

| compound                  | linear range( $\mu\text{g/L}$ ) | $R^2$  | LOD( $\mu\text{g/L}$ ) | LOQ( $\mu\text{g/L}$ ) |
|---------------------------|---------------------------------|--------|------------------------|------------------------|
| (+)-catechin              | 12-2300                         | 0.9991 | 1.15                   | 3.84                   |
| (-)-epicatechin           | 8-1600                          | 0.9995 | 1.08                   | 3.62                   |
| procyanidin B1            | 8-1700                          | 0.9992 | 2.24                   | 7.46                   |
| procyanidin B2            | 5-900                           | 0.9992 | 1.42                   | 4.76                   |
| phloridzin                | 9-1800                          | 0.9993 | 0.22                   | 0.73                   |
| chlorogenic acid          | 8-1500                          | 0.9998 | 2.11                   | 7.04                   |
| caffeic acid              | 6-1200                          | 0.9991 | 3.97                   | 13.16                  |
| $\rho$ -coumaric acid     | 7-1400                          | 0.999  | 29.13                  | 97.09                  |
| ferulic acid              | 7-1400                          | 0.9992 | 5.04                   | 17.86                  |
| gallic acid               | 14-2700                         | 0.9991 | 2.63                   | 8.77                   |
| quercetin                 | 9-1900                          | 0.9993 | 0.18                   | 0.6                    |
| quercetin-3-O-galactoside | 8-1600                          | 0.9995 | 0.52                   | 1.73                   |
| quercetin-3-O-rhamnoside  | 8-1600                          | 0.9993 | 0.1                    | 3.37                   |
| quercetin-3-O-rutinoside  | 9-1700                          | 0.9999 | 0.23                   | 0.78                   |
| quercetin-3-O-glucoside   | 16-3300                         | 0.9991 | 0.26                   | 0.88                   |
